# Supplementary material for: Diagnostics of Data-Driven Models: Uncertainty Quantification of PM7 Semi-Empirical Quantum Chemical Method
Source: PubMed Central journal article supplement (PMC6125339; doi:10.1038/s41598-018-31677-y), 2018-09-05
Supplement: 41598_2018_31677_MOESM1_ESM.pdf [file 41598_2018_31677_MOESM1_ESM.pdf]

# Supplementary Information - Diagnostics of Data-Driven Models: Uncertainty Quantification of PM7 Semi-Empirical Quantum Chemical Method

James Oreluk\*, Zhenyuan Liu\*, Arun Hegde\*, Wenyu Li\*,  
Andrew Packard\*, Michael Frenklach<sup>†</sup>, Dmitry Zubarev<sup>‡</sup>

Feasible parameter vectors and feasibility labels are provided in two sets of CSV files. The feasibility labels files, `feasiblePoints_labels_1.csv` and `feasiblePoints_labels_2.csv` are of size `nSamples-by-8`, where column 1 is the feasibility label associated with methane, column 2 is the feasibility label associated with ethane, and so forth to column 8 which is feasibility label for octane. True indicates feasible and false indicates infeasible.

The associated feasible parameters vector files, `feasiblePoints_parameters_1.csv` and `feasiblePoints_parameters_2.csv` are of size `nSamples-by-27`, where each row is a parameter vector. The columns are the 27 parameters listed in Table S1. The feasibility of a parameter vector is found in the corresponding row of the associated feasibility labels file.

---

\*Department of Mechanical Engineering, University of California at Berkeley, Berkeley, California 94720-1740

<sup>†</sup>Corresponding author: [frenklach@berkeley.edu](mailto:frenklach@berkeley.edu), Department of Mechanical Engineering, University of California at Berkeley, Berkeley, California 94720-1740

<sup>‡</sup>IBM Almaden Research Center, 650 Harry Road, San Jose, California 95136

Table S1: PM7 nominal parameter vector and the  $\delta$  associated with a 10 kcal/mol change in the heat of formation of  $C_4H_{10}$ , where each parameter value was perturbed, one-at-a-time from its nominal value.

| <b>Parameter</b>         | <b>Value</b> | <b><math>\delta</math></b> |
|--------------------------|--------------|----------------------------|
| <b>USS<sub>H</sub></b>   | -11.07       | 0.29033                    |
| <b>BETAS<sub>H</sub></b> | -8.3897      | 0.069276                   |
| <b>ZS<sub>H</sub></b>    | 1.2602       | 0.017434                   |
| <b>GSS<sub>H</sub></b>   | 14.15        | 0.36839                    |
| <b>FN11<sub>H</sub></b>  | 0.17785      | 0.009959                   |
| <b>FN21<sub>H</sub></b>  | 1.4287       | 0.33716                    |
| <b>FN31<sub>H</sub></b>  | 0.99132      | 0.077376                   |
| <b>ALPB<sub>H</sub></b>  | 4.0512       | 0.54877                    |
| <b>XFAC<sub>H</sub></b>  | 2.8456       | 4.875                      |
| <b>USS<sub>C</sub></b>   | -51.373      | 0.11427                    |
| <b>UPP<sub>C</sub></b>   | -40.135      | 0.084482                   |
| <b>BETAS<sub>C</sub></b> | -14.415      | 0.12922                    |
| <b>BETAP<sub>C</sub></b> | -7.8937      | 0.067632                   |
| <b>ZS<sub>C</sub></b>    | 1.9422       | 0.012886                   |
| <b>ZP<sub>C</sub></b>    | 1.7087       | 0.007471                   |
| <b>GSS<sub>C</sub></b>   | 12.347       | 0.13671                    |
| <b>GSP<sub>C</sub></b>   | 11.933       | 0.18749                    |
| <b>GPP<sub>C</sub></b>   | 10.452       | 0.8254                     |
| <b>GP2<sub>C</sub></b>   | 9.3855       | 0.031369                   |
| <b>HSP<sub>C</sub></b>   | 0.80263      | 0.11697                    |
| <b>FN11<sub>C</sub></b>  | 0.045888     | 0.005604                   |
| <b>FN21<sub>C</sub></b>  | 5.0371       | 1.5601                     |
| <b>FN31<sub>C</sub></b>  | 1.5887       | 0.12723                    |
| <b>ALPB<sub>HC</sub></b> | 1.0387       | 0.007624                   |
| <b>XFAC<sub>HC</sub></b> | 0.20458      | 0.002002                   |
| <b>ALPC<sub>C</sub></b>  | 2.6557       | 0.024061                   |
| <b>XFAC<sub>C</sub></b>  | 0.93782      | 0.034605                   |

Table S2: Parameter vector of  $\mathcal{F}_{2,8}$  found via global optimization with a genetic algorithm using MATLAB's *ga* function.

| Parameter          | Value    |
|--------------------|----------|
| USS <sub>H</sub>   | -14.577  |
| BETAS <sub>H</sub> | -7.3947  |
| ZS <sub>H</sub>    | 1.1558   |
| GSS <sub>H</sub>   | 15.096   |
| FN11 <sub>H</sub>  | 0.21973  |
| FN21 <sub>H</sub>  | 1.3555   |
| FN31 <sub>H</sub>  | 0.89818  |
| ALPB <sub>H</sub>  | 4.0908   |
| XFAC <sub>H</sub>  | 2.6264   |
| USS <sub>C</sub>   | -50.896  |
| UPP <sub>C</sub>   | -42.679  |
| BETAS <sub>C</sub> | -12.204  |
| BETAP <sub>C</sub> | -8.0123  |
| ZS <sub>C</sub>    | 1.9807   |
| ZP <sub>C</sub>    | 1.5976   |
| GSS <sub>C</sub>   | 12.653   |
| GSP <sub>C</sub>   | 10.104   |
| GPP <sub>C</sub>   | 9.8942   |
| GP2 <sub>C</sub>   | 9.8562   |
| HSP <sub>C</sub>   | 0.77597  |
| FN11 <sub>C</sub>  | 0.051751 |
| FN21 <sub>C</sub>  | 4.8582   |
| FN31 <sub>C</sub>  | 1.6624   |
| ALPB <sub>HC</sub> | 1.0878   |
| XFAC <sub>HC</sub> | 0.17728  |
| ALPC <sub>C</sub>  | 2.5316   |
| XFAC <sub>C</sub>  | 0.75887  |

Table S3: Percentage of feasible points found (out of 5.76 million samples) for each alkane and pair of alkanes.

|                                | CH <sub>4</sub> | C <sub>2</sub> H <sub>6</sub> | C <sub>3</sub> H <sub>8</sub> | C <sub>4</sub> H <sub>10</sub> | C <sub>5</sub> H <sub>12</sub> | C <sub>6</sub> H <sub>14</sub> | C <sub>7</sub> H <sub>16</sub> | C <sub>8</sub> H <sub>18</sub> |
|--------------------------------|-----------------|-------------------------------|-------------------------------|--------------------------------|--------------------------------|--------------------------------|--------------------------------|--------------------------------|
| CH <sub>4</sub>                | 0.2647          | 0.0036                        | 0.0028                        | 0.0027                         | 0.0026                         | 0.0019                         | 0.0025                         | 0.0030                         |
| C <sub>2</sub> H <sub>6</sub>  |                 | 0.4253                        | 0.0148                        | 0.0113                         | 0.0093                         | 0.0077                         | 0.0088                         | 0.0100                         |
| C <sub>3</sub> H <sub>8</sub>  |                 |                               | 0.4063                        | 0.0318                         | 0.018                          | 0.0133                         | 0.0140                         | 0.0159                         |
| C <sub>4</sub> H <sub>10</sub> |                 |                               |                               | 0.4441                         | 0.0572                         | 0.0317                         | 0.0297                         | 0.0307                         |
| C <sub>5</sub> H <sub>12</sub> |                 |                               |                               |                                | 0.4172                         | 0.0698                         | 0.0501                         | 0.0461                         |
| C <sub>6</sub> H <sub>14</sub> |                 |                               |                               |                                |                                | 0.3869                         | 0.1070                         | 0.0750                         |
| C <sub>7</sub> H <sub>16</sub> |                 |                               |                               |                                |                                |                                | 0.4723                         | 0.1915                         |
| C <sub>8</sub> H <sub>18</sub> |                 |                               |                               |                                |                                |                                |                                | 0.5723                         |

Table S4: Largest percentage of feasible samples for three alkanes, indexed by QOI model.

| $\mathcal{F}_{i,j,k}$ | Percentage of<br>feasible samples |
|-----------------------|-----------------------------------|
| 6, 7, 8               | 0.0738                            |
| 5, 6, 7               | 0.0488                            |
| 5, 6, 8               | 0.0434                            |
| 5, 7, 8               | 0.0432                            |
| 4, 5, 6               | 0.0312                            |
| 4, 5, 7               | 0.0285                            |
| 4, 6, 7               | 0.0282                            |
| 4, 5, 8               | 0.0278                            |
| 4, 7, 8               | 0.0266                            |
| 4, 6, 8               | 0.0260                            |

Table S5: Feasible sets of consecutive alkanes which had a few or no feasible samples, indexed by the QOI model.

| QOI Index        | Number of<br>feasible samples |
|------------------|-------------------------------|
| 1, 2, 3          | 7                             |
| 1, 2, 3, 4       | 4                             |
| 1, 2, 3, 4, 5    | 0                             |
| 2, 3, 4, 5       | 7                             |
| 5, 6, 7          | 2809                          |
| 5, 6, 7, 8       | 2431                          |
| 4, 5, 6, 7, 8    | 1431                          |
| 3, 4, 5, 6, 7, 8 | 145                           |

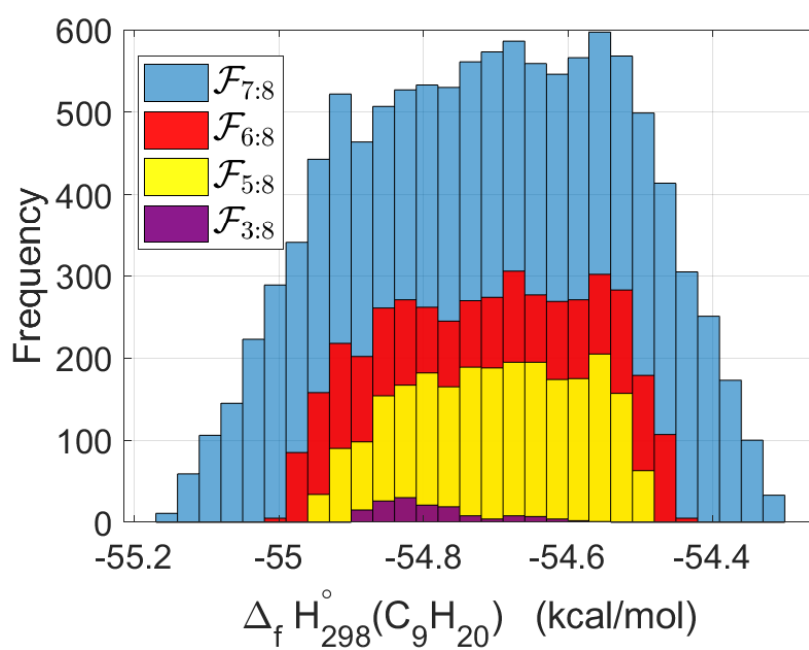

Figure S1: Predicted heat of formation of nonane by feasible samples of smaller alkanes. Using samples of  $\mathcal{F}_{3:8}$  reduce the uncertainty in the predicted heat of formation by 40.5% compared to the prediction from samples of  $\mathcal{F}_{7:8}$ .

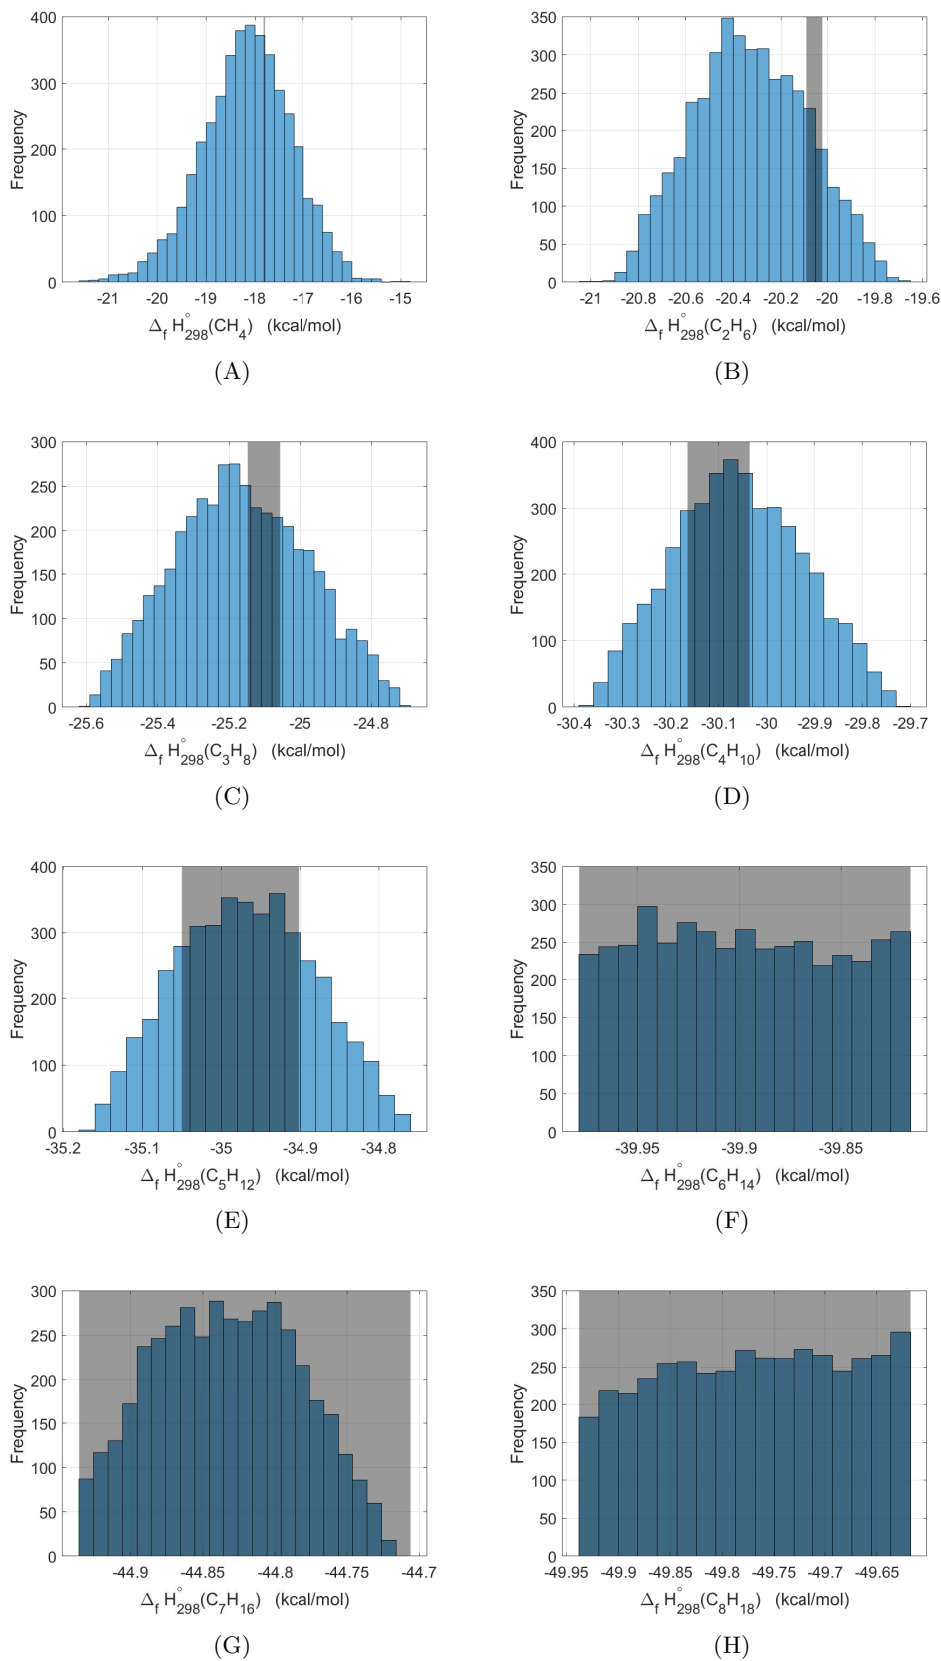

Figure S2: Predicted heat of formation of methane, ethane, to octane from samples of  $\mathcal{F}_{6.8}$ . The grey shaded region is the respective alkanes experimental interval shown in Table 1.

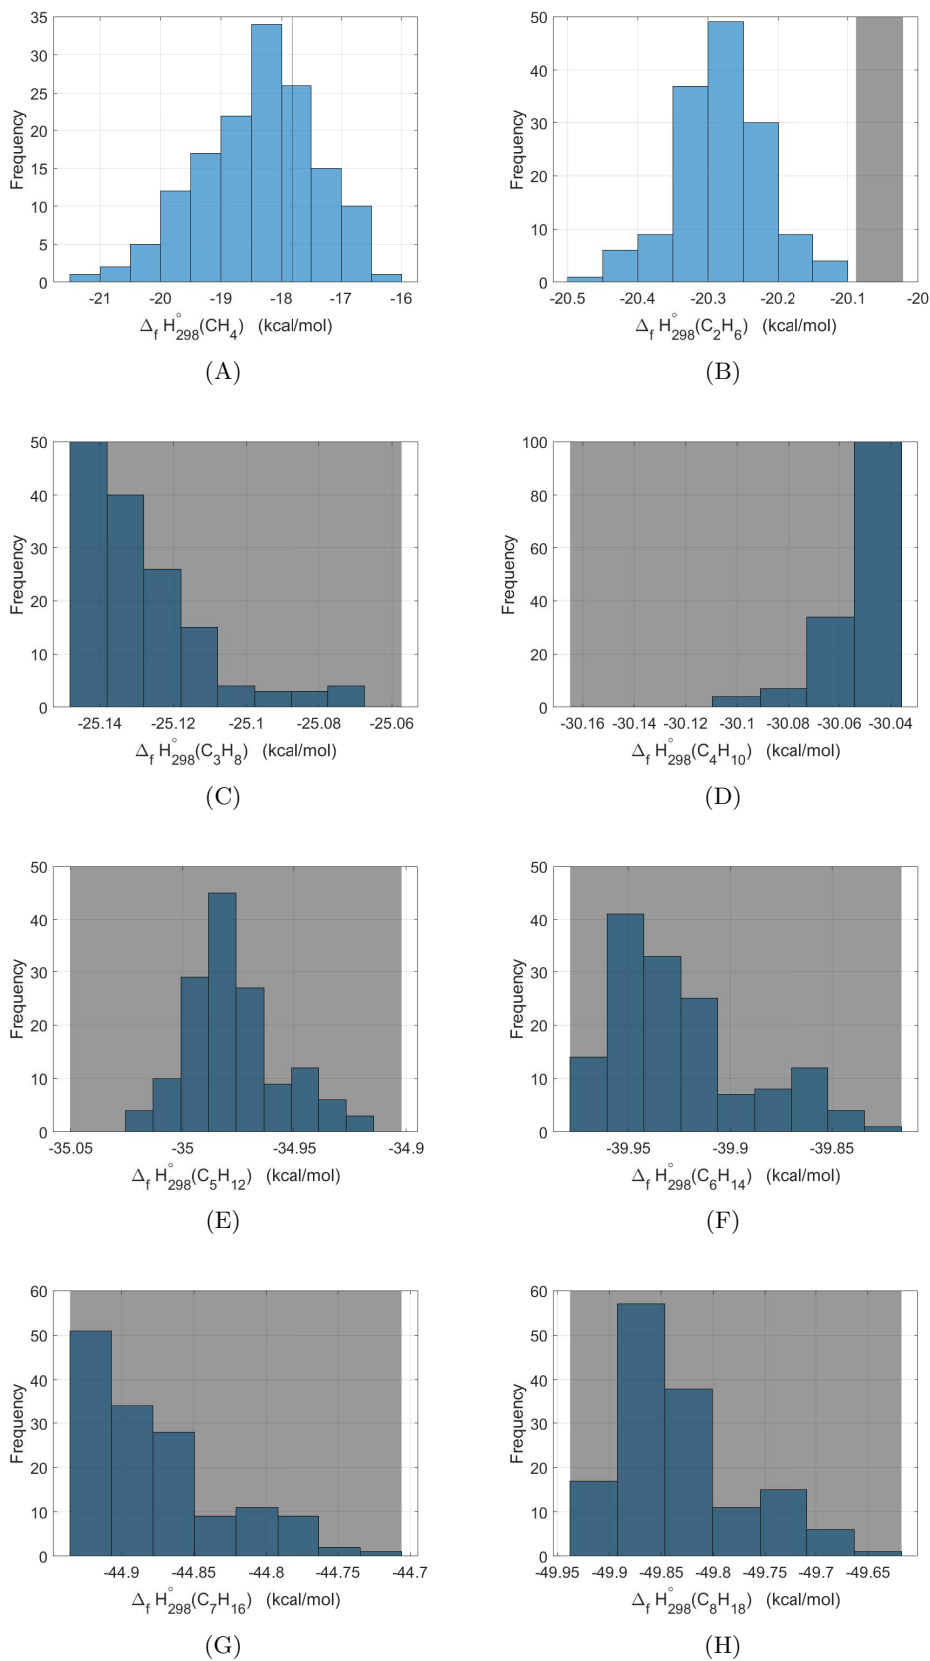

Figure S3: Predicted heat of formation of methane, ethane to octane from samples of  $\mathcal{F}_{3.8}$ . The grey shaded region is the respective alkanes experimental interval shown in Table 1.

## **Acknowledgments**

Work at UCB was supported by the Department of Energy, National Nuclear Security Administration, under Award Number(s) DE-NA0002375. The views and opinions of authors expressed herein do not necessarily state or reflect those of the United States Government or any agency thereof.
